# Supplementary material for: A genetically tractable branch of environmental Pedobacter from the phylum Bacteroidota represents a hotspot for natural product discovery
Source: Research Square preprint supplement (doi:10.21203/rs.3.rs-5790690/v1), 2025-04-14
Supplement: Supplementary file 1 [file 0c3a5b45b5770f77d1e4701f.xlsx]

## Sheet: Pedobacter_n143
Species	Strain	Type Strain	Tree Identifier	Other Strain Identifier	Assembly Identifier	Taxonomy Status	Species Affiliation based on TYGS	Closest subject strain	dDDH (d0, in %)	dDDH (d4, in %)	dDDH (d6, in %)	NRPS	PKS	Hybrid	NIS	Others
P. africanus	DSM12126	T	P. africanus DSM12126 T		GCF_900176535.1							0	1	1	0	2
P. agri	MDG1817		P. agri MDG1817	MADA_1817	GCA_032678505.1							0	1	0	0	2
P. agri	PB92		P. agri PB92		GCF_000258495.1							0	1	0	0	2
P. agri	DEU0392		P. agri DEU0392	DE_0392	GCA_032678765.1	Discrepancy	P. sp.	Pedobacter agri DSM 19486	30.3	24.1	27.8	0	1	1	0	2
P. agri	MDG1818		P. agri MDG1818	MADA_1818	GCA_032678665.1	Discrepancy	P. sp.	Pedobacter agri DSM 19486	58	35.6	52.4	0	1	1	0	2
P. alluvionis	DSM19624	T	P. alluvionis DSM19624 T		GCF_004402005.1							1	2	0	1	3
P. antarcticus	ATCC51969		P. antarcticus ATCC51969		GCF_900112985.1							0	1	1	0	3
P. antarcticus	DSM11725		P. antarcticus DSM11725		GCF_900103515.1							0	1	1	0	3
P. antarcticus	DEU0989		P. antarcticus DEU0989	DE_0989	GCA_032678685.1	Discrepancy	P. sp.	Pedobacter piscium DSM 11725	63.6	38.5	58	1	1	1	0	2
P. antarcticus	MDG173		P. antarcticus MDG173	MADA_173	GCA_032678545.1	Discrepancy	P. sp.	Pedobacter piscium DSM 11725	60.8	38.4	55.8	2	1	1	0	2
P. aquae	CJ43		P. aquae CJ43		CP043329							0	1	0	0	3
P. aquatilis	MDG852		P. aquatilis MDG852	MADA_852	GCA_032678405.1	Discrepancy	P. sp.	'Pedobacter sp. Leaf194' (GCF 001423945.1)	26.1	21.3	24.1	1	0	1	0	3
P. aquatilis	MDG2501		P. aquatilis MDG2501	MADA_2501	GCA_032678425.1	Discrepancy	P. sp.	Pedobacter aquatilis CECT 7114	46.3	27.6	40.5	0	0	1	0	5
P. aquatilis	MDG3506		P. aquatilis MDG3506	MADA_3506	GCA_032678385.1	Discrepancy	P. ginsengiterrae	Pedobacter ginsengiterrae JCM17338	81.6	86.7	85.4	0	1	1	0	4
P. arcticus	A12		P. arcticus A12		GCF_000302595.1							0	1	0	0	2
P. borealis	DSM19626	T	P. borealis DSM19626 T		GCF_000708285.2							0	1	0	0	4
P. boryungensis	LMG31300		P. boryungensis LMG31300		GCF_013204825.1							0	1	0	0	1
P. caeni	DSM16990	T	P. caeni DSM16990 T		GCF_900129215.1							0	2	1	0	11
P. changchengzhani	E01020		P. changchengzhani E01020		GCF_004354365.1							0	1	0	0	2
P. chinensis	JDX94		P. chinensis JDX94		GCF_003339865.1							0	0	0	0	1
P. chitinilyticus	CM134L-2		P. chitinilyticus CM134L-2		GCF_003313385.1							0	0	0	0	1
P. cryoconitis	Xaverov94		P. cryoconitis Xaverov94		GCF_019352875.1	Discrepancy	P. sp.	Pedobacter piscium DSM 11725	63.7	38.4	58	2	1	1	0	2
P. cryoconitis	ANJC1		P. cryoconitis ANJC1		GCF_014207145.1	Discrepancy	P. sp.	Pedobacter cryoconitis DSM 14825	37	25.5	33.1	5	2	2	2	9
P. cryoconitis	DSM14825	T	P. cryoconitis DSM14825 T		GCF_003259615.1							5	2	1	2	7
P. cryoconitis	K2C9		P. cryoconitis K2C9		GCF_014200595.1	Discrepancy	P. sp.	Pedobacter cryoconitis DSM 14825	62.3	37.2	56.4	3	2	3	2	8
P. cryoconitis	M2T3		P. cryoconitis M2T3		GCF_014207135.1	Discrepancy	P. sp.	Pedobacter cryoconitis DSM 14825	25	22.5	23.5	6	1	2	1	8
P. cryoconitis	MP7CTX6		P. cryoconitis MP7CTX6		GCF_014200615.1	Discrepancy	P. sp.	Pedobacter cryoconitis DSM 14825	62.2	37.4	56.4	5	2	3	2	10
P. cryoconitis	PAMC27485		P. cryoconitis PAMC27485		CP014504	Discrepancy	P. sp.	Pedobacter cryoconitis DSM 14825	52	35.7	47.9	3	2	3	2	8
P. cryoconitis	S3M1		P. cryoconitis S3M1		GCF_014200605.1	Discrepancy	P. sp.	Pedobacter cryoconitis DSM 14825	37.8	25.8	33.8	3	2	2	2	9
P. cryophilus	AR-3-17		P. cryophilus AR-3-17		GCF_005116455.1							0	1	0	0	3
P. cryotolerans	AR-2-6		P. cryotolerans AR-2-6		GCF_005116475.1							0	1	1	0	1
P. duraquae	DSM19034	T	P. duraquae DSM19034 T		GCF_004362245.1							1	1	1	0	3
P. endophyticus	JBR3-12		P. endophyticus JBR3-12		CP064939							0	1	0	0	2
P. fastidiosus	CCM8938		P. fastidiosus CCM8938		GCF_014306625.1							0	1	1	0	2
P. foliorum	LMG31463		P. foliorum LMG31463		GCF_013266735.1							1	2	1	0	4
P. frigidisoli	RP-3-11		P. frigidisoli RP-3-11		GCF_004331675.1							0	1	1	0	1
P. frigidisoli	MDG3128		P. frigidisoli MDG3128	MADA_3128	GCA_032678525.1	Discrepancy	P. sp.	'Pedobacter agri' (GCA 032678665.1)	18.4	21.1	18	0	1	1	0	4
P. frigiditerrae	RP-1-13		P. frigiditerrae RP-1-13		GCF_004331645.1							0	1	0	0	2
P. frigiditerrae	DEU0159		P. frigiditerrae DEU0159	DE_0159	GCA_032678565.1	Discrepancy	P. sp.	Pedobacter frigiditerrae RP-1-13	53.5	33.7	48.3	0	1	0	0	2
P. frigiditerrae	DEU0385		P. frigiditerrae DEU0385	DE_0385	GCA_032678705.1	Discrepancy	P. sp.	Pedobacter frigiditerrae RP-1-13	52.2	33.5	47.2	0	1	0	0	1
P. frigoris	RP-3-15		P. frigoris RP-3-15		GCF_005116445.1							1	1	1	0	3
P. frigoris	DEU0479		P. frigoris DEU0479	DE_0497	GCA_032678645.1	Discrepancy	P. sp.	Pedobacter frigoris KACC 21154	52.5	36.4	48.6	0	1	0	0	1
P. gandavensis	LMG31462		P. gandavensis LMG31462		GCF_014172405.1							1	1	1	0	2
P. gandavensis	DEU0380		P. gandavensis DEU0380	DE_0380	GCA_032678745.1	Discrepancy	P. sp.	Pedobacter gandavensis LMG 31462 T	44.4	28.2	39.4	1	2	1	0	2
P. gandavensis	MDG278		P. gandavensis MDG278	MADA_278	GCA_032678465.1	Discrepancy	P. sp.	Pedobacter gandavensis LMG 31462 T	42.6	25.8	37.2	1	1	1	0	1
P. gandavensis	S8-12.1		P. gandavensis S8-12.1	S8_12.1	GCA_032677645.1	Discrepancy	P. sp.	Pedobacter gandavensis LMG 31462 T	50.5	28.4	43.8	0	2	1	0	3
P. ghigonis	Marseille-Q2390		P. ghigonis Marseille-Q2390		GCF_903166585.1							0	1	0	1	5
P. ginsengisoli	T01R-27		P. ginsengisoli T01R-27		CP024091							0	2	1	0	2
P. ginsenosidimutans	KACC14530		P. ginsenosidimutans KACC14530		GCF_001442625.1							0	1	1	1	3
P. glucosidilyticus	DD6b		P. glucosidilyticus DD6b		GCF_000799115.1	Discrepancy	P. aquae	Pedobacter aquae CJ43	75.1	78.1	78.4	0	1	0	0	3
P. glucosidilyticus	DSM23534	T	P. glucosidilyticus DSM23534 T		GCF_000425145.1							0	1	0	0	2
P. hartonius	DSM19033	T	P. hartonius DSM19033 T		GCF_900107535.1							1	1	1	1	6
P. helvus	P-25		P. helvus P-25		GCF_005925325.1	Discrepancy	P. sp.	Pedobacter xixiisoli CGMCC 1.12803	32.8	25.4	30	0	0	0	0	3
P. heparinus	DSM2366	T	P. heparinus DSM2366 T		GCF_000023825.1							0	1	1	0	3
P. hiemivivus	RP-1-16		P. hiemivivus RP-1-16		GCF_005144565.1							1	1	1	0	1
P. hiemivivus	RP-3-8		P. hiemivivus RP-3-8		GCF_004331685.1							1	1	1	0	1
P. insulae	DSM18684	T	P. insulae DSM18684 T		GCF_900113525.1							0	1	0	0	1
P. jejuensis	TNB23		P. jejuensis TNB23		GCF_003725795.1							1	1	1	0	1
P. jeongneungensis	H1ai		P. jeongneungensis H1ai		GCF_000633455.1	Discrepancy	P. sp.	Pedobacter jeongneungensis JCM 17626	54.3	34.7	49.3	0	2	0	1	8
P. kyonggii	K-4-11-1		P. kyonggii K-4-11-1		GCF_004310665.1							1	2	0	0	4
P. kyungheensis	KACC16221		P. kyungheensis KACC16221		GCF_000812965.1							0	1	0	1	5
P. lusitanus	NL19		P. lusitanus NL19		GCF_000832545.1							4	2	1	2	8
P. mendelii	CCM8939		P. mendelii CCM8939		GCF_014635725.1							0	1	1	0	2
P. metabolipauper	DSM19035	T	P. metabolipauper DSM19035 T		GCF_004362715.1							0	1	0	0	4
P. miscanthi	RS10		P. miscanthi RS10		GCF_003315595.1							0	2	0	1	5
P. miscanthi	DEU0302		P. miscanthi DEU0302	DE_0302	GCA_032678605.1	Discrepancy	P. sp.	Pedobacter jeongneungensis JCM 17626	41	29.8	37.5	0	2	0	1	6
P. montanisoli	CYS-01		P. montanisoli CYS-01		GCF_022809115.1							0	0	0	0	1
P. mucosus	Q8-18		P. mucosus Q8-18		CP087585							0	1	0	0	1
P. namyangjuensis	5G38		P. namyangjuensis 5G38		GCF_003313325.1							0	1	1	0	2
P. nanyangensis	Q-4		P. nanyangensis Q-4		GCF_003313505.1							0	0	0	0	1
P. nototheniae	36B243		P. nototheniae 36B243		GCF_004335085.1							0	0	0	0	3
P. nototheniae	DEU0550		P. nototheniae DEU0550	DE_0550	GCA_032678625.1	Discrepancy	P. sp.	Pedobacter nototheniae 36B243T	48.1	27.1	41.6	0	0	0	0	1
P. nutrimenti	DSM27372	T	P. nutrimenti DSM27372 T		GCF_003208655.1							0	1	1	0	2
P. nutrimenti	DEU0410		P. nutrimenti DEU0410	DE_0410	GCA_032678445.1	Discrepancy	P. sp.	Pedobacter nutrimenti DSM 27372	18.1	19.6	17.7	1	2	1	0	3
P. nyackensis	DSM19625	T	P. nyackensis DSM19625 T		GCF_900176505.1							1	1	0	0	0
P. nyackensis	MDG2608		P. nyackensis MDG2608	MADA_2608	GCA_032678475.1	Discrepancy	P. sp.	Pedobacter schmidteae eg	22.8	22.6	21.7	1	1	1	0	2
P. paludis	R-8		P. paludis R-8		GCF_003173575.1							0	0	1	0	3
P. panaciterrae	LMG23400		P. panaciterrae LMG23400		GCF_013204795.1							0	2	1	0	1
P. panaciterrae	O48		P. panaciterrae O48		GCF_001636695.1	Discrepancy	P. sp.	Pedobacter panaciterrae LMG 23400	43.4	32	40	0	3	1	0	4
P. petrophilus	LMG29686		P. petrophilus LMG29686		GCF_009674725.1							0	0	1	1	4
P. planticolens	LMG31464		P. planticolens LMG31464		GCF_014172375.1							0	1	0	0	1
P. polaris	RP-3-22		P. polaris RP-3-22		GCF_005116505.1							0	1	0	0	1
P. psychrodurus	RP-3-21		P. psychrodurus RP-3-21		GCF_004331735.1							0	2	1	1	4
P. psychrodurus	DEU0801		P. psychrodurus DEU0801	DE_0801	GCA_032678585.1	Discrepancy	P. sp.	Pedobacter borealis DSM 19626	28.2	28.9	27.1	1	2	0	1	2
P. psychrophilus	CCM8644		P. psychrophilus CCM8644		GCF_001652725.1							0	1	0	0	3
P. psychroterrae	RP-1-14		P. psychroterrae RP-1-14		GCF_004331695.1							0	1	0	0	2
P. psychrotolerans	DSM103236	T	P. psychrotolerans DSM103236 T		GCF_004340665.1							3	2	1	1	2
P. puniceum	HX-22-1		P. puniceum HX-22-1		GCF_009674685.1							0	1	0	0	3
P. quisquiliarum	CGMCC1.15343		P. quisquiliarum CGMCC1.15343		GCF_014642175.1							0	1	1	0	2
P. rhizosphaerae	DSM18610	T	P. rhizosphaerae DSM18610 T		GCF_900111155.1							0	1	0	0	3
P. riviphilus	SW-16		P. riviphilus SW-16		CP061171.1							0	2	0	1	4
P. roseus	KACC11594		P. roseus KACC11594		CP060723	Discrepancy	P. sp.	Pedobacter jeongneungensis JCM 17626	54.2	32.9	48.5	0	2	1	1	6
P. schmidteae	eg		P. schmidteae eg		GCF_900564155.1							0	1	1	0	2
P. segetis	SD-b		P. segetis SD-b		GCF_016623585.1							0	1	0	0	2
P. soli	DSM18609	T	P. soli DSM18609 T		GCF_900101435.1							0	1	0	1	5
P. sp.	G11		P. sp. G11		CP034190	Discrepancy	P. agri	Pedobacter agri DSM 19486	76	78.2	79.2	0	1	0	0	2
P. sp.	AK017		P. sp. AK017		GCF_014200825.1	Discrepancy	P. heparinus	Pedobacter heparinus DSM 2366	72.4	88.3	77.7	1	1	1	0	5
P. sp.	ASV2		P. sp. ASV2		GCF_016429355.1	Discrepancy	P. nototheniae	Pedobacter nototheniae 36B243T	81.6	85.6	85.3	0	0	0	0	2
P. sp.	AJM		P. sp. AJM		GCF_002197755.1							0	0	0	1	4
P. sp.	AK013		P. sp. AK013		GCF_014205835.1							0	1	1	1	3
P. sp.	ASV12		P. sp. ASV12		GCF_016429155.1							0	0	0	0	2
P. sp.	ASV17		P. sp. ASV17		GCF_016429065.1							0	0	0	0	1
P. sp.	ASV19		P. sp. ASV19		GCF_016429005.1							0	2	1	0	3
P. sp.	ASV28		P. sp. ASV28		GCF_016428855.1							0	1	0	0	2
P. sp.	B4-66		P. sp. B4-66		GCF_018492665.1							1	2	0	0	1
P. sp.	BAL39		P. sp. BAL39		GCF_000170795.1							0	1	1	0	6
P. sp.	Bi126		P. sp. Bi126		GCF_918698245.1							0	2	0	1	2
P. sp.	Bi27		P. sp. Bi27		GCF_918698255.1							0	1	1	1	2
P. sp.	D749		P. sp. D749		CP079218							1	2	0	1	4
P. sp.	HDW13		P. sp. HDW13		CP049868							0	0	0	1	5
P. sp.	HMWF019		P. sp. HMWF019		GCF_003061025.1							1	2	1	0	4
P. sp.	Hv1		P. sp. Hv1		GCF_001412215.1							0	0	0	0	0
P. sp.	ISL-64		P. sp. ISL-64		GCF_018613605.1							0	2	0	1	0
P. sp.	KBS0701		P. sp. KBS0701		CP042171.1							0	1	0	1	2
P. sp.	KBW01		P. sp. KBW01		GCF_003852395.1							0	1	0	1	5
P. sp.	L105		P. sp. L105		GCF_009765875.1							2	2	0	1	6
P. sp.	Leaf132		P. sp. Leaf132		GCF_920984695.1							0	1	1	0	2
P. sp.	Leaf170		P. sp. Leaf170		GCF_920984665.1							0	1	1	0	2
P. sp.	Leaf176		P. sp. Leaf176		GCF_001424305.1							0	1	1	0	1
P. sp.	Leaf194		P. sp. Leaf194		GCF_001423945.1							0	1	1	0	1
P. sp.	Leaf216		P. sp. Leaf216		GCF_001421515.1							0	1	1	0	4
P. sp.	Leaf250		P. sp. Leaf250		GCF_920984735.1							0	1	1	0	2
P. sp.	Leaf41		P. sp. Leaf41		GCF_001422545.1							0	1	1	0	1
P. sp.	MC2016-14		P. sp. MC2016-14		GCF_020991475.1							1	1	0	0	3
P. sp.	MC2016-24		P. sp. MC2016-24		GCF_015223055.1							1	1	0	1	2
P. sp.	MR2016-19		P. sp. MR2016-19		GCF_014947265.1							0	1	1	1	6
P. sp.	N36a		P. sp. N36a		GCF_014472395.1							0	1	1	0	3
P. sp.	ok626		P. sp. ok626		GCF_900100435.1							1	1	1	0	4
P. sp.	R20-19		P. sp. R20-19		GCF_000708265.2							0	2	0	0	4
P. sp.	S10-4.1		P. sp. S10-4.1	S10_4.1	GCA_032678725.1	Discrepancy	P. sp.	Pedobacter heparinus DSM 2366	42.3	25.6	36.9	0	1	1	0	2
P. sp.	SG908		P. sp. SG908		GCF_011759615.1							0	2	0	1	4
P. sp.	SG918		P. sp. SG918		GCF_012932485.1	Discrepancy	P. riviphilus	Pedobacter riviphilus SW-16	87.3	82.7	89.3	0	2	0	1	4
P. sp.	V48		P. sp. V48		GCF_000523515.1							0	2	1	0	2
P. steynii	DSM19110	T	P. steynii DSM19110 T		GCF_900103665.1							5	2	1	1	8
P. steynii	DX4		P. steynii DX4		CP017141.1	Discrepancy	P. sp.	Pedobacter caeni DSM 16990	38	26.4	34.1	1	2	2	0	6
P. suwonensis	DSM18130	T	P. suwonensis DSM18130 T		GCF_900111825.1							3	1	1	0	3
P. suwonensis	Fj1		P. suwonensis Fj1		CP031708.1							0	1	0	0	3
P. terrae	DSM17933	T	P. terrae DSM17933 T		GCF_900100705.1							2	1	0	1	4
P. ureilyticus	THG-T11		P. ureilyticus THG-T11		GCF_005925345.1							0	0	0	0	2
P. westerhofensis	DSM19036	T	P. westerhofensis DSM19036 T		GCF_900182595.1							0	2	1	0	4
P. xixiisoli	CGMCC1.12803		P. xixiisoli CGMCC1.12803		GCF_900215335.1							0	0	1	0	3
P. yonginense	KCTC22721		P. yonginense KCTC22721		GCF_003173595.1							0	1	1	0	3
P. zeae	DSM100774	T	P. zeae DSM100774 T		GCF_014196715.1							0	1	0	1	5
			#VALUE!
			#VALUE!
			#VALUE!
			#VALUE!
			#VALUE!
			#VALUE!
			#VALUE!
			#VALUE!
			#VALUE!
			#VALUE!
			#VALUE!
			#VALUE!
			#VALUE!
			#VALUE!
			#VALUE!
			#VALUE!
			#VALUE!
			#VALUE!
			#VALUE!
			#VALUE!
			#VALUE!
			#VALUE!
			#VALUE!
			#VALUE!
			#VALUE!
			#VALUE!
			#VALUE!
			#VALUE!
			#VALUE!
			#VALUE!
			#VALUE!
			#VALUE!
			#VALUE!
			#VALUE!
			#VALUE!
			#VALUE!
			#VALUE!
			#VALUE!
			#VALUE!
			#VALUE!
			#VALUE!
			#VALUE!
			#VALUE!
			#VALUE!
			#VALUE!
			#VALUE!
			#VALUE!
			#VALUE!
			#VALUE!
			#VALUE!
			#VALUE!
			#VALUE!
			#VALUE!
			#VALUE!
			#VALUE!
			#VALUE!
			#VALUE!
			#VALUE!
			#VALUE!
			#VALUE!
			#VALUE!
			#VALUE!
			#VALUE!
			#VALUE!
			#VALUE!
			#VALUE!
			#VALUE!
			#VALUE!
			#VALUE!
			#VALUE!
			#VALUE!
			#VALUE!
			#VALUE!
			#VALUE!
			#VALUE!
			#VALUE!
			#VALUE!
			#VALUE!
			#VALUE!
			#VALUE!
			#VALUE!
			#VALUE!
			#VALUE!
			#VALUE!
			#VALUE!
			#VALUE!
			#VALUE!
			#VALUE!
			#VALUE!
			#VALUE!
			#VALUE!
			#VALUE!
			#VALUE!
			#VALUE!
			#VALUE!
			#VALUE!
			#VALUE!
			#VALUE!
			#VALUE!
			#VALUE!
			#VALUE!
			#VALUE!
			#VALUE!
			#VALUE!
			#VALUE!
			#VALUE!
			#VALUE!
			#VALUE!
			#VALUE!
			#VALUE!
			#VALUE!
			#VALUE!
			#VALUE!
			#VALUE!
			#VALUE!
			#VALUE!
			#VALUE!
			#VALUE!
			#VALUE!
			#VALUE!
			#VALUE!
			#VALUE!
			#VALUE!
			#VALUE!
			#VALUE!
			#VALUE!
			#VALUE!
			#VALUE!
			#VALUE!
			#VALUE!
			#VALUE!
			#VALUE!
			#VALUE!
			#VALUE!
			#VALUE!
			#VALUE!
			#VALUE!
			#VALUE!
			#VALUE!
			#VALUE!
			#VALUE!
			#VALUE!
			#VALUE!
			#VALUE!
			#VALUE!
			#VALUE!
			#VALUE!
			#VALUE!
			#VALUE!
			#VALUE!
			#VALUE!
			#VALUE!
			#VALUE!
			#VALUE!
			#VALUE!
			#VALUE!
			#VALUE!
			#VALUE!
			#VALUE!
			#VALUE!
			#VALUE!
			#VALUE!
			#VALUE!
			#VALUE!
			#VALUE!
			#VALUE!
			#VALUE!
			#VALUE!
			#VALUE!
			#VALUE!
			#VALUE!
			#VALUE!
			#VALUE!
			#VALUE!
			#VALUE!
			#VALUE!
			#VALUE!
			#VALUE!
			#VALUE!
			#VALUE!
			#VALUE!
			#VALUE!
			#VALUE!
			#VALUE!
			#VALUE!
			#VALUE!
			#VALUE!
			#VALUE!
			#VALUE!
			#VALUE!
			#VALUE!
			#VALUE!
			#VALUE!
			#VALUE!
			#VALUE!
			#VALUE!
			#VALUE!
			#VALUE!
			#VALUE!
			#VALUE!
			#VALUE!
			#VALUE!
			#VALUE!
			#VALUE!
			#VALUE!
			#VALUE!
			#VALUE!
			#VALUE!
			#VALUE!
			#VALUE!
			#VALUE!
			#VALUE!
			#VALUE!
			#VALUE!
			#VALUE!
			#VALUE!
			#VALUE!
			#VALUE!
			#VALUE!
			#VALUE!
			#VALUE!
			#VALUE!
			#VALUE!
			#VALUE!
			#VALUE!
			#VALUE!
			#VALUE!
			#VALUE!
			#VALUE!
			#VALUE!
			#VALUE!
			#VALUE!
			#VALUE!
			#VALUE!
			#VALUE!
			#VALUE!
			#VALUE!
			#VALUE!
			#VALUE!
			#VALUE!
			#VALUE!
			#VALUE!
			#VALUE!
			#VALUE!
			#VALUE!
			#VALUE!
			#VALUE!
			#VALUE!
			#VALUE!
			#VALUE!
			#VALUE!
			#VALUE!
			#VALUE!
			#VALUE!
			#VALUE!
			#VALUE!
			#VALUE!
			#VALUE!
			#VALUE!
			#VALUE!
			#VALUE!
			#VALUE!
			#VALUE!
			#VALUE!
			#VALUE!
			#VALUE!
			#VALUE!
			#VALUE!
			#VALUE!
			#VALUE!
			#VALUE!
			#VALUE!
			#VALUE!
			#VALUE!
			#VALUE!
			#VALUE!
			#VALUE!
			#VALUE!
			#VALUE!
			#VALUE!
			#VALUE!
			#VALUE!
			#VALUE!
			#VALUE!
			#VALUE!
			#VALUE!
			#VALUE!
			#VALUE!
			#VALUE!
			#VALUE!
			#VALUE!
			#VALUE!
			#VALUE!
			#VALUE!
			#VALUE!
			#VALUE!
			#VALUE!
			#VALUE!
			#VALUE!
			#VALUE!
			#VALUE!
			#VALUE!
			#VALUE!
			#VALUE!
			#VALUE!
			#VALUE!
			#VALUE!
			#VALUE!
			#VALUE!
			#VALUE!
			#VALUE!
			#VALUE!
			#VALUE!
			#VALUE!
			#VALUE!
			#VALUE!
			#VALUE!
			#VALUE!
			#VALUE!
			#VALUE!
			#VALUE!
			#VALUE!
			#VALUE!
			#VALUE!
			#VALUE!
			#VALUE!
			#VALUE!
			#VALUE!
			#VALUE!
			#VALUE!
			#VALUE!
			#VALUE!
			#VALUE!
			#VALUE!
			#VALUE!
			#VALUE!
			#VALUE!
			#VALUE!
			#VALUE!
			#VALUE!
			#VALUE!
			#VALUE!
			#VALUE!
			#VALUE!
			#VALUE!
			#VALUE!
			#VALUE!
			#VALUE!
			#VALUE!
			#VALUE!
			#VALUE!
			#VALUE!
			#VALUE!
			#VALUE!
			#VALUE!
			#VALUE!
			#VALUE!
			#VALUE!
			#VALUE!
			#VALUE!
			#VALUE!
			#VALUE!
			#VALUE!
			#VALUE!
			#VALUE!
			#VALUE!
			#VALUE!
			#VALUE!
			#VALUE!
			#VALUE!
			#VALUE!
			#VALUE!
			#VALUE!
			#VALUE!
			#VALUE!
			#VALUE!
			#VALUE!
			#VALUE!
			#VALUE!
			#VALUE!
			#VALUE!
			#VALUE!
			#VALUE!
			#VALUE!
			#VALUE!
			#VALUE!
			#VALUE!
			#VALUE!
			#VALUE!
			#VALUE!
			#VALUE!
			#VALUE!
			#VALUE!
			#VALUE!
			#VALUE!
			#VALUE!
			#VALUE!
			#VALUE!
			#VALUE!
			#VALUE!
			#VALUE!
			#VALUE!
			#VALUE!
			#VALUE!
			#VALUE!
			#VALUE!
			#VALUE!
			#VALUE!
			#VALUE!
			#VALUE!
			#VALUE!
			#VALUE!
			#VALUE!
			#VALUE!
			#VALUE!
			#VALUE!
			#VALUE!
			#VALUE!
			#VALUE!
			#VALUE!
			#VALUE!
			#VALUE!
			#VALUE!
			#VALUE!
			#VALUE!
			#VALUE!
			#VALUE!
			#VALUE!
			#VALUE!
			#VALUE!
			#VALUE!
			#VALUE!
			#VALUE!
			#VALUE!
			#VALUE!
			#VALUE!
			#VALUE!
			#VALUE!
			#VALUE!
			#VALUE!
			#VALUE!
			#VALUE!
			#VALUE!
			#VALUE!
			#VALUE!
			#VALUE!
			#VALUE!
			#VALUE!
			#VALUE!
			#VALUE!
			#VALUE!
			#VALUE!
			#VALUE!
			#VALUE!
			#VALUE!
			#VALUE!
			#VALUE!
			#VALUE!
			#VALUE!
			#VALUE!
			#VALUE!
			#VALUE!
			#VALUE!
			#VALUE!
			#VALUE!
			#VALUE!
			#VALUE!
			#VALUE!
			#VALUE!
			#VALUE!
			#VALUE!
			#VALUE!
			#VALUE!
			#VALUE!
			#VALUE!
			#VALUE!
			#VALUE!
			#VALUE!
			#VALUE!
			#VALUE!
			#VALUE!
			#VALUE!
			#VALUE!
			#VALUE!
			#VALUE!
			#VALUE!
			#VALUE!
			#VALUE!
			#VALUE!
			#VALUE!
			#VALUE!
			#VALUE!
			#VALUE!
			#VALUE!
			#VALUE!
			#VALUE!
			#VALUE!
			#VALUE!
			#VALUE!
			#VALUE!
			#VALUE!
			#VALUE!
			#VALUE!
			#VALUE!
			#VALUE!
			#VALUE!
			#VALUE!
			#VALUE!
			#VALUE!
			#VALUE!
			#VALUE!
			#VALUE!
			#VALUE!
			#VALUE!
			#VALUE!
			#VALUE!
			#VALUE!
			#VALUE!
			#VALUE!
			#VALUE!
			#VALUE!
			#VALUE!
			#VALUE!
			#VALUE!
			#VALUE!
			#VALUE!
			#VALUE!
			#VALUE!
			#VALUE!
			#VALUE!
			#VALUE!
			#VALUE!
			#VALUE!
			#VALUE!
			#VALUE!
			#VALUE!
			#VALUE!
			#VALUE!
			#VALUE!
			#VALUE!
			#VALUE!
			#VALUE!
			#VALUE!
			#VALUE!
			#VALUE!
			#VALUE!
			#VALUE!
			#VALUE!
			#VALUE!
			#VALUE!
			#VALUE!
			#VALUE!
			#VALUE!
			#VALUE!
			#VALUE!
			#VALUE!
			#VALUE!
			#VALUE!
			#VALUE!
			#VALUE!
			#VALUE!
			#VALUE!
			#VALUE!
			#VALUE!
			#VALUE!
			#VALUE!
			#VALUE!
			#VALUE!
			#VALUE!
			#VALUE!
			#VALUE!
			#VALUE!
			#VALUE!
			#VALUE!
			#VALUE!
			#VALUE!
			#VALUE!
			#VALUE!
			#VALUE!
			#VALUE!
			#VALUE!
			#VALUE!
			#VALUE!
			#VALUE!
			#VALUE!
			#VALUE!
			#VALUE!
			#VALUE!
			#VALUE!
			#VALUE!
			#VALUE!
			#VALUE!
			#VALUE!
			#VALUE!
			#VALUE!
			#VALUE!
			#VALUE!
			#VALUE!
			#VALUE!
			#VALUE!
			#VALUE!
			#VALUE!
			#VALUE!
			#VALUE!
			#VALUE!
			#VALUE!
			#VALUE!
			#VALUE!
			#VALUE!
			#VALUE!
			#VALUE!
			#VALUE!
			#VALUE!
			#VALUE!
			#VALUE!
			#VALUE!
			#VALUE!
			#VALUE!
			#VALUE!
			#VALUE!
			#VALUE!
			#VALUE!
			#VALUE!
			#VALUE!
			#VALUE!
			#VALUE!
			#VALUE!
			#VALUE!
			#VALUE!
			#VALUE!
			#VALUE!
			#VALUE!
			#VALUE!
			#VALUE!
			#VALUE!
			#VALUE!
			#VALUE!
			#VALUE!
			#VALUE!
			#VALUE!
			#VALUE!
			#VALUE!
			#VALUE!
			#VALUE!
			#VALUE!
			#VALUE!
			#VALUE!
			#VALUE!
			#VALUE!
			#VALUE!
			#VALUE!
			#VALUE!
			#VALUE!
			#VALUE!
			#VALUE!
			#VALUE!
			#VALUE!
			#VALUE!
			#VALUE!
			#VALUE!
			#VALUE!
			#VALUE!
			#VALUE!
			#VALUE!
			#VALUE!
			#VALUE!
			#VALUE!
			#VALUE!
			#VALUE!
			#VALUE!
			#VALUE!
			#VALUE!
			#VALUE!
			#VALUE!
			#VALUE!
			#VALUE!
			#VALUE!
			#VALUE!
			#VALUE!
			#VALUE!
			#VALUE!
			#VALUE!
			#VALUE!
			#VALUE!
			#VALUE!
			#VALUE!
			#VALUE!
			#VALUE!
			#VALUE!
			#VALUE!
			#VALUE!
			#VALUE!
			#VALUE!
			#VALUE!
			#VALUE!
			#VALUE!
			#VALUE!
			#VALUE!
			#VALUE!
			#VALUE!
			#VALUE!
			#VALUE!
			#VALUE!
			#VALUE!
			#VALUE!
			#VALUE!
			#VALUE!
			#VALUE!
			#VALUE!
			#VALUE!
			#VALUE!
			#VALUE!
			#VALUE!
			#VALUE!
			#VALUE!
			#VALUE!
			#VALUE!
			#VALUE!
			#VALUE!
			#VALUE!
			#VALUE!
			#VALUE!
			#VALUE!
			#VALUE!
			#VALUE!
			#VALUE!
			#VALUE!
			#VALUE!
			#VALUE!
			#VALUE!
			#VALUE!
			#VALUE!
			#VALUE!
			#VALUE!
			#VALUE!
			#VALUE!
			#VALUE!
			#VALUE!
			#VALUE!
			#VALUE!
			#VALUE!
			#VALUE!
			#VALUE!
			#VALUE!
			#VALUE!
			#VALUE!
			#VALUE!
			#VALUE!
			#VALUE!
			#VALUE!
			#VALUE!
			#VALUE!
			#VALUE!
			#VALUE!
			#VALUE!
			#VALUE!
			#VALUE!
			#VALUE!
			#VALUE!
			#VALUE!
			#VALUE!
			#VALUE!
			#VALUE!
			#VALUE!
			#VALUE!
			#VALUE!
			#VALUE!
			#VALUE!
			#VALUE!
			#VALUE!
			#VALUE!
			#VALUE!
			#VALUE!
			#VALUE!
			#VALUE!
			#VALUE!
			#VALUE!
			#VALUE!
			#VALUE!
			#VALUE!
			#VALUE!
			#VALUE!
			#VALUE!
			#VALUE!
			#VALUE!
			#VALUE!
			#VALUE!
			#VALUE!
			#VALUE!
			#VALUE!
			#VALUE!
			#VALUE!
			#VALUE!
			#VALUE!
			#VALUE!
			#VALUE!
			#VALUE!
			#VALUE!
			#VALUE!
			#VALUE!
			#VALUE!
			#VALUE!
			#VALUE!
			#VALUE!
			#VALUE!
			#VALUE!
			#VALUE!
			#VALUE!
			#VALUE!
			#VALUE!
			#VALUE!
			#VALUE!
			#VALUE!
			#VALUE!
			#VALUE!
			#VALUE!
			#VALUE!
			#VALUE!
			#VALUE!
			#VALUE!
			#VALUE!
			#VALUE!
			#VALUE!
			#VALUE!
			#VALUE!
			#VALUE!
			#VALUE!
			#VALUE!
			#VALUE!
			#VALUE!
			#VALUE!
			#VALUE!
			#VALUE!
			#VALUE!
			#VALUE!
			#VALUE!
			#VALUE!
			#VALUE!
			#VALUE!
			#VALUE!
			#VALUE!
			#VALUE!
			#VALUE!
			#VALUE!
			#VALUE!
			#VALUE!
			#VALUE!
			#VALUE!
			#VALUE!
			#VALUE!
			#VALUE!
			#VALUE!
			#VALUE!
			#VALUE!
			#VALUE!
			#VALUE!
			#VALUE!
			#VALUE!
			#VALUE!
			#VALUE!
			#VALUE!
			#VALUE!
			#VALUE!
			#VALUE!
			#VALUE!
			#VALUE!
			#VALUE!
			#VALUE!
			#VALUE!
			#VALUE!
			#VALUE!
			#VALUE!
			#VALUE!
			#VALUE!
			#VALUE!
			#VALUE!
			#VALUE!
			#VALUE!
			#VALUE!
			#VALUE!
			#VALUE!
			#VALUE!
			#VALUE!
			#VALUE!
			#VALUE!
			#VALUE!
			#VALUE!
			#VALUE!
			#VALUE!
			#VALUE!
			#VALUE!
			#VALUE!
			#VALUE!
			#VALUE!
			#VALUE!
			#VALUE!
			#VALUE!
			#VALUE!
			#VALUE!
			#VALUE!
			#VALUE!
			#VALUE!
			#VALUE!
			#VALUE!
			#VALUE!
			#VALUE!
			#VALUE!
			#VALUE!
			#VALUE!
			#VALUE!
			#VALUE!
			#VALUE!
			#VALUE!
			#VALUE!
			#VALUE!
			#VALUE!
			#VALUE!
			#VALUE!
			#VALUE!
			#VALUE!
			#VALUE!
			#VALUE!
			#VALUE!
			#VALUE!
			#VALUE!
			#VALUE!
			#VALUE!
			#VALUE!
			#VALUE!
			#VALUE!
			#VALUE!
			#VALUE!
			#VALUE!
			#VALUE!
			#VALUE!
			#VALUE!
			#VALUE!
			#VALUE!
			#VALUE!
			#VALUE!
			#VALUE!
			#VALUE!
			#VALUE!
			#VALUE!
			#VALUE!
			#VALUE!
			#VALUE!
			#VALUE!
			#VALUE!
			#VALUE!
			#VALUE!
			#VALUE!
			#VALUE!
			#VALUE!
			#VALUE!
			#VALUE!
			#VALUE!
			#VALUE!
			#VALUE!
			#VALUE!
			#VALUE!
			#VALUE!
			#VALUE!
			#VALUE!
			#VALUE!
			#VALUE!
			#VALUE!
			#VALUE!
			#VALUE!
			#VALUE!
			#VALUE!
			#VALUE!
			#VALUE!
			#VALUE!
			#VALUE!
			#VALUE!
			#VALUE!
			#VALUE!
			#VALUE!
			#VALUE!
			#VALUE!
			#VALUE!
			#VALUE!
			#VALUE!
			#VALUE!
			#VALUE!
			#VALUE!
			#VALUE!
			#VALUE!
			#VALUE!
			#VALUE!
			#VALUE!
			#VALUE!
			#VALUE!
			#VALUE!
			#VALUE!
			#VALUE!
			#VALUE!
			#VALUE!
			#VALUE!
			#VALUE!
			#VALUE!
			#VALUE!
			#VALUE!
			#VALUE!
			#VALUE!
			#VALUE!
			#VALUE!
			#VALUE!
			#VALUE!
			#VALUE!
			#VALUE!
			#VALUE!
			#VALUE!
			#VALUE!
			#VALUE!
			#VALUE!
			#VALUE!
			#VALUE!
			#VALUE!
			#VALUE!
			#VALUE!
			#VALUE!
			#VALUE!
			#VALUE!
			#VALUE!
			#VALUE!
			#VALUE!
			#VALUE!
			#VALUE!
			#VALUE!
			#VALUE!
			#VALUE!
			#VALUE!
			#VALUE!
			#VALUE!
			#VALUE!
			#VALUE!
			#VALUE!
			#VALUE!
			#VALUE!
			#VALUE!
			#VALUE!
			#VALUE!
			#VALUE!
			#VALUE!
			#VALUE!
			#VALUE!
			#VALUE!
			#VALUE!
			#VALUE!
			#VALUE!
			#VALUE!
			#VALUE!
			#VALUE!
			#VALUE!
			#VALUE!
			#VALUE!
			#VALUE!
			#VALUE!
			#VALUE!
			#VALUE!
			#VALUE!
			#VALUE!
			#VALUE!
			#VALUE!
			#VALUE!
			#VALUE!
			#VALUE!
			#VALUE!
			#VALUE!
			#VALUE!
			#VALUE!
			#VALUE!
			#VALUE!
			#VALUE!
			#VALUE!
			#VALUE!
			#VALUE!
			#VALUE!
			#VALUE!
			#VALUE!
			#VALUE!
			#VALUE!
			#VALUE!
			#VALUE!
			#VALUE!
			#VALUE!
			#VALUE!
			#VALUE!
			#VALUE!
			#VALUE!
			#VALUE!
			#VALUE!
			#VALUE!
			#VALUE!
			#VALUE!
			#VALUE!
			#VALUE!
			#VALUE!
			#VALUE!
			#VALUE!
			#VALUE!
			#VALUE!
			#VALUE!
			#VALUE!
			#VALUE!
			#VALUE!
			#VALUE!
			#VALUE!
			#VALUE!
			#VALUE!
			#VALUE!
			#VALUE!
			#VALUE!
			#VALUE!
			#VALUE!
			#VALUE!
			#VALUE!
			#VALUE!
			#VALUE!
			#VALUE!
			#VALUE!
			#VALUE!
			#VALUE!
			#VALUE!
			#VALUE!
			#VALUE!
			#VALUE!
			#VALUE!
			#VALUE!
			#VALUE!
			#VALUE!
			#VALUE!
			#VALUE!
			#VALUE!
			#VALUE!
			#VALUE!
			#VALUE!
			#VALUE!
			#VALUE!
			#VALUE!
			#VALUE!
			#VALUE!
			#VALUE!
			#VALUE!
			#VALUE!
			#VALUE!
			#VALUE!
			#VALUE!
			#VALUE!
			#VALUE!
			#VALUE!
			#VALUE!
			#VALUE!
			#VALUE!
			#VALUE!
			#VALUE!
			#VALUE!
			#VALUE!
			#VALUE!
			#VALUE!
			#VALUE!
			#VALUE!
			#VALUE!
			#VALUE!
			#VALUE!
			#VALUE!
			#VALUE!
			#VALUE!
			#VALUE!
			#VALUE!
			#VALUE!
			#VALUE!
			#VALUE!
			#VALUE!
			#VALUE!
			#VALUE!
			#VALUE!
			#VALUE!
			#VALUE!
			#VALUE!
			#VALUE!
			#VALUE!
			#VALUE!
			#VALUE!
			#VALUE!
			#VALUE!
			#VALUE!
			#VALUE!
			#VALUE!
			#VALUE!
			#VALUE!
			#VALUE!
			#VALUE!
			#VALUE!
			#VALUE!
			#VALUE!
			#VALUE!
			#VALUE!
			#VALUE!
			#VALUE!
			#VALUE!
			#VALUE!
			#VALUE!
			#VALUE!
			#VALUE!
			#VALUE!
			#VALUE!
			#VALUE!
			#VALUE!
			#VALUE!
			#VALUE!
			#VALUE!
			#VALUE!
			#VALUE!
			#VALUE!
			#VALUE!
			#VALUE!
			#VALUE!
			#VALUE!
			#VALUE!
			#VALUE!
			#VALUE!
			#VALUE!
			#VALUE!
			#VALUE!
			#VALUE!
			#VALUE!
			#VALUE!
			#VALUE!
			#VALUE!
			#VALUE!
			#VALUE!
			#VALUE!
			#VALUE!
			#VALUE!
			#VALUE!
			#VALUE!
			#VALUE!
			#VALUE!
			#VALUE!
			#VALUE!
			#VALUE!
			#VALUE!
			#VALUE!
			#VALUE!
			#VALUE!
			#VALUE!
			#VALUE!
			#VALUE!
			#VALUE!
			#VALUE!
			#VALUE!
			#VALUE!
			#VALUE!
			#VALUE!
			#VALUE!
			#VALUE!
			#VALUE!
			#VALUE!
			#VALUE!
			#VALUE!
			#VALUE!
			#VALUE!
			#VALUE!
			#VALUE!
			#VALUE!
			#VALUE!
			#VALUE!
			#VALUE!
			#VALUE!
			#VALUE!
			#VALUE!
			#VALUE!
			#VALUE!
			#VALUE!
			#VALUE!
			#VALUE!
			#VALUE!
			#VALUE!
			#VALUE!
			#VALUE!
			#VALUE!
			#VALUE!
			#VALUE!
			#VALUE!
			#VALUE!
			#VALUE!
			#VALUE!
			#VALUE!
			#VALUE!
			#VALUE!
			#VALUE!
			#VALUE!
			#VALUE!
			#VALUE!
			#VALUE!
			#VALUE!
			#VALUE!
			#VALUE!
			#VALUE!
			#VALUE!
			#VALUE!
			#VALUE!
			#VALUE!
			#VALUE!
			#VALUE!
			#VALUE!
			#VALUE!
			#VALUE!
			#VALUE!
			#VALUE!
			#VALUE!
			#VALUE!
			#VALUE!
			#VALUE!
			#VALUE!
			#VALUE!
			#VALUE!
			#VALUE!
			#VALUE!
			#VALUE!
			#VALUE!
			#VALUE!
			#VALUE!
			#VALUE!
			#VALUE!
			#VALUE!
			#VALUE!
			#VALUE!
			#VALUE!
			#VALUE!
			#VALUE!
			#VALUE!
			#VALUE!
			#VALUE!
			#VALUE!
			#VALUE!
			#VALUE!
			#VALUE!
			#VALUE!
			#VALUE!
			#VALUE!
			#VALUE!
			#VALUE!
			#VALUE!
			#VALUE!
			#VALUE!
			#VALUE!
			#VALUE!
			#VALUE!
			#VALUE!
			#VALUE!
			#VALUE!
			#VALUE!
			#VALUE!
			#VALUE!
			#VALUE!
			#VALUE!
			#VALUE!
			#VALUE!
			#VALUE!
			#VALUE!
			#VALUE!
			#VALUE!
			#VALUE!
			#VALUE!
			#VALUE!
			#VALUE!
			#VALUE!
			#VALUE!
			#VALUE!
			#VALUE!
			#VALUE!
			#VALUE!
			#VALUE!
			#VALUE!
			#VALUE!
			#VALUE!
			#VALUE!
			#VALUE!
			#VALUE!
			#VALUE!
			#VALUE!
			#VALUE!
			#VALUE!
			#VALUE!
			#VALUE!
			#VALUE!
			#VALUE!
			#VALUE!
			#VALUE!
			#VALUE!
			#VALUE!
			#VALUE!
			#VALUE!
			#VALUE!
			#VALUE!
			#VALUE!
			#VALUE!
			#VALUE!
			#VALUE!
			#VALUE!
			#VALUE!
			#VALUE!
			#VALUE!
			#VALUE!
			#VALUE!
			#VALUE!
			#VALUE!
			#VALUE!
			#VALUE!
			#VALUE!
			#VALUE!
			#VALUE!
			#VALUE!
			#VALUE!
			#VALUE!
			#VALUE!
			#VALUE!
			#VALUE!
			#VALUE!
			#VALUE!
			#VALUE!
			#VALUE!
			#VALUE!
			#VALUE!
			#VALUE!
			#VALUE!
			#VALUE!
			#VALUE!
			#VALUE!
			#VALUE!
			#VALUE!
			#VALUE!
			#VALUE!
			#VALUE!
			#VALUE!
			#VALUE!
			#VALUE!
			#VALUE!
			#VALUE!
			#VALUE!
			#VALUE!
			#VALUE!
			#VALUE!
			#VALUE!
			#VALUE!
			#VALUE!
			#VALUE!
			#VALUE!
			#VALUE!
			#VALUE!
			#VALUE!
			#VALUE!
			#VALUE!
			#VALUE!
			#VALUE!
			#VALUE!
			#VALUE!
			#VALUE!
			#VALUE!
			#VALUE!
			#VALUE!
			#VALUE!
			#VALUE!
			#VALUE!
			#VALUE!
			#VALUE!
			#VALUE!
			#VALUE!
			#VALUE!
			#VALUE!
			#VALUE!
			#VALUE!
			#VALUE!
			#VALUE!
			#VALUE!
			#VALUE!
			#VALUE!
			#VALUE!
			#VALUE!
			#VALUE!
			#VALUE!
			#VALUE!
			#VALUE!
			#VALUE!
			#VALUE!
			#VALUE!
			#VALUE!
			#VALUE!
			#VALUE!
			#VALUE!
			#VALUE!
			#VALUE!
			#VALUE!
			#VALUE!
			#VALUE!
			#VALUE!
			#VALUE!
			#VALUE!
			#VALUE!
			#VALUE!
			#VALUE!
			#VALUE!
			#VALUE!
			#VALUE!
			#VALUE!
			#VALUE!
			#VALUE!
			#VALUE!
			#VALUE!
			#VALUE!
			#VALUE!
			#VALUE!
			#VALUE!
			#VALUE!
			#VALUE!
			#VALUE!
			#VALUE!
			#VALUE!
			#VALUE!
			#VALUE!
			#VALUE!
			#VALUE!
			#VALUE!
			#VALUE!
			#VALUE!
			#VALUE!
			#VALUE!
			#VALUE!
			#VALUE!
			#VALUE!
			#VALUE!
			#VALUE!
			#VALUE!
			#VALUE!
			#VALUE!
			#VALUE!
			#VALUE!
			#VALUE!
			#VALUE!
			#VALUE!
			#VALUE!
			#VALUE!
			#VALUE!
			#VALUE!
			#VALUE!
			#VALUE!
			#VALUE!
			#VALUE!
			#VALUE!
			#VALUE!
			#VALUE!
			#VALUE!
			#VALUE!
			#VALUE!
			#VALUE!
			#VALUE!
			#VALUE!
			#VALUE!
			#VALUE!
			#VALUE!
			#VALUE!
			#VALUE!
			#VALUE!
			#VALUE!
			#VALUE!
			#VALUE!
			#VALUE!
			#VALUE!
			#VALUE!
			#VALUE!
			#VALUE!
			#VALUE!
			#VALUE!
			#VALUE!
			#VALUE!
			#VALUE!
			#VALUE!
			#VALUE!
			#VALUE!
			#VALUE!
			#VALUE!
			#VALUE!
			#VALUE!
			#VALUE!
			#VALUE!
			#VALUE!
			#VALUE!
			#VALUE!
			#VALUE!
			#VALUE!
			#VALUE!
			#VALUE!
			#VALUE!
			#VALUE!
			#VALUE!
			#VALUE!
			#VALUE!
			#VALUE!
			#VALUE!
			#VALUE!
			#VALUE!
			#VALUE!
			#VALUE!
			#VALUE!
			#VALUE!
			#VALUE!
			#VALUE!
			#VALUE!
			#VALUE!
			#VALUE!
			#VALUE!
			#VALUE!
			#VALUE!
			#VALUE!
			#VALUE!
			#VALUE!
			#VALUE!
			#VALUE!
			#VALUE!
			#VALUE!
			#VALUE!
			#VALUE!
			#VALUE!
			#VALUE!
			#VALUE!
			#VALUE!
			#VALUE!
			#VALUE!
			#VALUE!
			#VALUE!
			#VALUE!
			#VALUE!
			#VALUE!
			#VALUE!
			#VALUE!
			#VALUE!
			#VALUE!
			#VALUE!
			#VALUE!
			#VALUE!
			#VALUE!
			#VALUE!
			#VALUE!
			#VALUE!
			#VALUE!
			#VALUE!
			#VALUE!
			#VALUE!
			#VALUE!
			#VALUE!
			#VALUE!
			#VALUE!
			#VALUE!
			#VALUE!
			#VALUE!
			#VALUE!
			#VALUE!
			#VALUE!
			#VALUE!
			#VALUE!
			#VALUE!
			#VALUE!
			#VALUE!
			#VALUE!
			#VALUE!
			#VALUE!
			#VALUE!
			#VALUE!
			#VALUE!
			#VALUE!
			#VALUE!
			#VALUE!
			#VALUE!
			#VALUE!
			#VALUE!
			#VALUE!
			#VALUE!
			#VALUE!
			#VALUE!
			#VALUE!
			#VALUE!
			#VALUE!
			#VALUE!
			#VALUE!
			#VALUE!
			#VALUE!
			#VALUE!
			#VALUE!
			#VALUE!
			#VALUE!
			#VALUE!
			#VALUE!
			#VALUE!
			#VALUE!
			#VALUE!
			#VALUE!
			#VALUE!
			#VALUE!
			#VALUE!
			#VALUE!
			#VALUE!
			#VALUE!
			#VALUE!
			#VALUE!
			#VALUE!
			#VALUE!
			#VALUE!
			#VALUE!
			#VALUE!
			#VALUE!
			#VALUE!
			#VALUE!
			#VALUE!
			#VALUE!
			#VALUE!
			#VALUE!
			#VALUE!
			#VALUE!
			#VALUE!
			#VALUE!
			#VALUE!
			#VALUE!
			#VALUE!
			#VALUE!
			#VALUE!
			#VALUE!
			#VALUE!
			#VALUE!
			#VALUE!
			#VALUE!
			#VALUE!
			#VALUE!
			#VALUE!
			#VALUE!
			#VALUE!
			#VALUE!
			#VALUE!
			#VALUE!
			#VALUE!
			#VALUE!
			#VALUE!
			#VALUE!
			#VALUE!
			#VALUE!
			#VALUE!
			#VALUE!
			#VALUE!
			#VALUE!
			#VALUE!
			#VALUE!
			#VALUE!
			#VALUE!
			#VALUE!
			#VALUE!
			#VALUE!
			#VALUE!
			#VALUE!
			#VALUE!
			#VALUE!
			#VALUE!
			#VALUE!
			#VALUE!
			#VALUE!
			#VALUE!
			#VALUE!
			#VALUE!
			#VALUE!
			#VALUE!
			#VALUE!
			#VALUE!
			#VALUE!
			#VALUE!
			#VALUE!
			#VALUE!
			#VALUE!
			#VALUE!
			#VALUE!
			#VALUE!
			#VALUE!
			#VALUE!
			#VALUE!
			#VALUE!
			#VALUE!
			#VALUE!
			#VALUE!
			#VALUE!
			#VALUE!
			#VALUE!
			#VALUE!
			#VALUE!
			#VALUE!
			#VALUE!
			#VALUE!
			#VALUE!
			#VALUE!
			#VALUE!
			#VALUE!
			#VALUE!
			#VALUE!
			#VALUE!
			#VALUE!
			#VALUE!
			#VALUE!
			#VALUE!
			#VALUE!
			#VALUE!
			#VALUE!
			#VALUE!
			#VALUE!
			#VALUE!
			#VALUE!
			#VALUE!
			#VALUE!
			#VALUE!
			#VALUE!
			#VALUE!
			#VALUE!
			#VALUE!
			#VALUE!
			#VALUE!
			#VALUE!
			#VALUE!
			#VALUE!
			#VALUE!
			#VALUE!
			#VALUE!
			#VALUE!
			#VALUE!
			#VALUE!
			#VALUE!
			#VALUE!
			#VALUE!
			#VALUE!
			#VALUE!
			#VALUE!
			#VALUE!
			#VALUE!
			#VALUE!
			#VALUE!
			#VALUE!
			#VALUE!
			#VALUE!
			#VALUE!
			#VALUE!
			#VALUE!
			#VALUE!
			#VALUE!
			#VALUE!
			#VALUE!
			#VALUE!
			#VALUE!
			#VALUE!
[truncated: 1,046,576+ more rows]
